# Supplementary material for: ALS blood expression profiling identifies new biomarkers, patient subgroups, and evidence for neutrophilia and hypoxia
Source: Springer Nature journal article supplement (doi:10.1186/s12967-019-1909-0), 2019-05-22
Supplement: MOESM19 [file 16742172]

**Additional File 19. Published sensitivity and specificity estimates for ALS sample classification.** The table lists the first author of each study and publication year, PubMed identifier (PMID), biofluid source, samples sizes (ALS and CTL groups), type of CTL group, biomarker or rule applied for classification, reported sensitivity (Sens) and specificity (Spec). For the “CTL type” column, values are healthy controls (HC), diseased control (DC), or the combination of healthy and diseased controls (HC+DC).

| Study               | PMID     | Fluid | <i>n</i> (ALS) | <i>n</i> (CTL) | CTL Type | Biomarker          | Sens | Spec  |
|---------------------|----------|-------|----------------|----------------|----------|--------------------|------|-------|
| Ranganathan 2005    | 28799854 | CSF   | 10             | 10             | DC       | Transthyretin      | 70.0 | 60.0  |
| Ranganathan 2005    | 28799854 | CSF   | 5              | 7              | HC+DC    | 7B2CT + TTR        | 80.0 | 71.0  |
| Ranganathan 2005    | 28799854 | CSF   | 10             | 10             | DC       | 10 protein panel   | 80.0 | 60.0  |
| Ranganathan 2005    | 28799854 | CSF   | 5              | 7              | HC+DC    | 19 protein panel   | 80.0 | 100.0 |
| Brettschneider 2006 | 16567701 | CSF   | 69             | 33             | HC       | NFH                | 71.0 | 88.0  |
| Brettschneider 2006 | 16567701 | CSF   | 69             | 33             | HC       | Tau                | 52.0 | 75.0  |
| Brettschneider 2006 | 16567701 | CSF   | 69             | 73             | DC       | NFH                | 89.0 | 92.0  |
| Brettschneider 2006 | 16567701 | CSF   | 69             | 73             | DC       | Tau                | 81.0 | 78.0  |
| Pasinetti 2006      | 16481598 | CSF   | 36             | 21             | HC       | 4.8 kDa protein    | 48.0 | 86.0  |
| Pasinetti 2006      | 16481598 | CSF   | 36             | 21             | HC       | 6.7 kDa protein    | 91.0 | 86.0  |
| Pasinetti 2006      | 16481598 | CSF   | 36             | 21             | HC       | 13.4 kDa protein   | 91.0 | 50.0  |
| Pasinetti 2006      | 16481598 | CSF   | 36             | 21             | HC       | 3 protein model    | 91.0 | 97.0  |
| Mitchell 2009       | 18987350 | CSF   | 41             | 33             | DC       | 5 protein panel    | 87.5 | 91.2  |
| Reijn 2009          | 19296046 | CSF   | 32             | 26             | DC       | pNFH > 502 ng/L    | 72.0 | 80.0  |
| Reijn 2009          | 19296046 | CSF   | 32             | 26             | DC       | NFL > 22.6 ng/L    | 75.0 | 79.0  |
| Ryberg 2010         | 20583124 | CSF   | 100            | 41             | HC       | CRP > 9 mg/ml      | 51.0 | 85.0  |
| Ryberg 2010         | 20583124 | CSF   | 100            | 41             | HC       | Transthyretin      | 63.0 | 70.0  |
| Ryberg 2010         | 20583124 | CSF   | 100            | 41             | HC       | 41 Biomarker Panel | 63.0 | 94.0  |
| Ryberg 2010         | 20583124 | CSF   | 100            | 141            | HC+DC    | CRP                | 65.0 | 60.0  |
| Ryberg 2010         | 20583124 | CSF   | 100            | 141            | HC+DC    | Cystatin C         | 60.0 | 71.0  |
| Ryberg 2010         | 20583124 | CSF   | 100            | 141            | HC+DC    | Transthyretin      | 63.0 | 47.0  |
| Ganesalingam 2011   | 21418221 | CSF   | 26             | 31             | HC+DC    | pNFH               | 95.0 | 93.0  |
| Ganesalingam 2011   | 21418221 | CSF   | 26             | 31             | HC+DC    | pNFH/C3 ratio      | 96.0 | 90.0  |
| Ganesalingam 2011   | 21418221 | CSF   | 45             | 61             | HC+DC    | pNFH > 0.635 ng/mL | 84.4 | 93.5  |
| Ganesalingam 2011   | 21418221 | CSF   | 45             | 61             | HC+DC    | pNFH/C3 > 0.000125 | 91.1 | 88.7  |
| Ganesalingam 2011   | 21418221 | CSF   | 45             | 61             | HC+DC    | pNFH/C3 > 0.21     | 77.8 | 95.2  |
| Ganesalingam 2011   | 21418221 | CSF   | 45             | 61             | HC+DC    | pNFH/CRP > 0.3755  | 61.4 | 87.1  |

|                   |          |       |     |     |       |                                                       |      |       |
|-------------------|----------|-------|-----|-----|-------|-------------------------------------------------------|------|-------|
| Ganesalingam 2011 | 21418221 | CSF   | 45  | 61  | HC+DC | pNFH > 0.635 + pNFH/C3 > 0.000125                     | 84.4 | 95.2  |
| Ganesalingam 2011 | 21418221 | CSF   | 45  | 61  | HC+DC | pNFH/C3 > 0.00021 + pNFH/CRP > 0.3755                 | 52.2 | 100.0 |
| Ganesalingam 2011 | 21418221 | CSF   | 45  | 61  | HC+DC | pNFH/C3 > 0.00021 or pNFH/CRP > 0.3755                | 86.4 | 83.9  |
| Ganesalingam 2011 | 21418221 | CSF   | 45  | 61  | HC+DC | pNFH > 0.635 + pNFH/C3 > 0.000125 + pNFH/CRP > 0.3755 | 59.1 | 100.0 |
| Tortelli 2012     | 22680408 | CSF   | 37  | 46  | DC+DC | NFL > 1981 ng/l                                       | 78.4 | 72.5  |
| Conraux 2013      | 24224000 | Blood | 10  | 10  | HC    | C18 SVM Peptide Model                                 | 97.9 | 99.7  |
| Conraux 2013      | 24224000 | Blood | 10  | 10  | HC    | C8 SVM Peptide Model                                  | 87.8 | 96.9  |
| Gaiottino 2013    | 24073237 | Blood | 46  | 67  | HC    | NFL > 26.6 pg/ml                                      | 91.3 | 91.0  |
| Hwang 2013        | 23639787 | Blood | 61  | 120 | HC+DC | HMGB1 autoAb > 0.81 µg/mL                             | 64.0 | 93.0  |
| Lawton 2014       | 24984169 | Blood | 172 | 50  | HC    | Random Forest w/ 367 metabolites                      | 76.0 | 78.0  |
| Lawton 2014       | 24984169 | Blood | 172 | 73  | DC    | SVM w/ 367 metabolites                                | 62.0 | 81.0  |
| Lawton 2014       | 24984169 | Blood | 172 | 73  | DC    | Lasso w/ 367 metabolites                              | 65.0 | 81.0  |
| Lawton 2014       | 24984169 | Blood | 172 | 73  | DC    | Random Forest w/ 367 metabolites                      | 62.0 | 66.0  |
| Lawton 2014       | 24984169 | Blood | 172 | 73  | DC    | LASSO w/ 32 metabolites                               | 58.0 | 90.0  |
| Lawton 2014       | 24984169 | Blood | 172 | 73  | DC    | SVM w/ 32 metabolites                                 | 49.0 | 90.0  |
| Shepherd 2014     | 24475283 | Urine | 28  | 12  | HC    | p75NTR                                                | 93.0 | 100.0 |
| Shepherd 2014     | 24475283 | Urine | 28  | 19  | DC    | p75NTR                                                | 93.0 | 79.0  |
| Gonçalves 2015    | 25261856 | CSF   | 29  | 19  | DC    | pNFH > 385 pg/ml                                      | 82.8 | 64.7  |
| Gonçalves 2015    | 25261856 | CSF   | 29  | 19  | DC    | N-glycans > 5.96%                                     | 41.4 | 82.4  |
| Lu 2015           | 25934855 | CSF   | 38  | 20  | HC    | NFL > 1781 pg/ml                                      | 97.0 | 95.0  |
| Lu 2015           | 25934855 | Blood | 64  | 36  | HC    | NFL > 36 pg/ml                                        | 89.0 | 75.0  |
| Lu 2015           | 25934855 | Blood | 103 | 42  | HC    | NFL > 36.2 pg/ml                                      | 90.0 | 71.0  |
| Chen 2016         | 27634542 | CSF   | 40  | 40  | DC    | pNFH > 437 ng/L                                       | 97.3 | 83.8  |
| Chen 2016         | 27634542 | CSF   | 40  | 40  | DC    | Chitotriosidase > 1593.779 ng/L                       | 83.8 | 81.1  |

|                 |          |       |     |    |       |                         |       |      |
|-----------------|----------|-------|-----|----|-------|-------------------------|-------|------|
| Chen 2016       | 27634542 | CSF   | 40  | 40 | DC    | pNFH + Chitotriosidase  | 83.8  | 91.9 |
| Oeckl 2016      | 27415180 | CSF   | 75  | 75 | HC+DC | pNFH >568.5 pg/mL       | 78.7  | 93.3 |
| Oeckl 2016      | 27415180 | CSF   | 75  | 75 | HC+DC | NFL > 1431 pg/mL        | 79.0  | 86.4 |
| Steinacker 2016 | 26296871 | CSF   | 253 | 85 | DC    | NFL > 2200 pg/mL        | 77.0  | 88.0 |
| Steinacker 2016 | 26296871 | CSF   | 253 | 85 | DC    | pNFH > 560 pg/mL        | 83.0  | 80.0 |
| Sheinerman 2017 | 29121998 | Blood | 50  | 50 | HC    | miR-206 + miR-338-3p    | 68.0  | 74.0 |
| Sheinerman 2017 | 29121998 | Blood | 50  | 50 | HC    | miR-9* + miR-129-3p     | 65.0  | 67.0 |
| Sheinerman 2017 | 29121998 | Blood | 50  | 50 | HC    | miR-335-5p + miR-338-3p | 62.0  | 74.0 |
| Sheinerman 2017 | 29121998 | Blood | 50  | 50 | HC    | miRNA classifier        | 84.0  | 82.0 |
| Sheinerman 2017 | 29121998 | Blood | 50  | 50 | DC    | miR-31 + miR-206        | 78.0  | 78.0 |
| Sheinerman 2017 | 29121998 | Blood | 50  | 50 | DC    | miR-125b + miR-335-5p   | 62.0  | 72.0 |
| Sheinerman 2017 | 29121998 | Blood | 50  | 50 | DC    | miR-107 + miR-491-5p    | 74.0  | 70.0 |
| Sheinerman 2017 | 29121998 | Blood | 50  | 50 | DC    | miRNA classifier        | 92.0  | 94.0 |
| Sheinerman 2017 | 29121998 | Blood | 50  | 50 | DC    | miR-9* + miR-206        | 78.0  | 78.0 |
| Sheinerman 2017 | 29121998 | Blood | 50  | 50 | DC    | miR-155 + miR-206       | 80.0  | 74.0 |
| Sheinerman 2017 | 29121998 | Blood | 50  | 50 | DC    | miR-7 + miR-206         | 80.0  | 76.0 |
| Sheinerman 2017 | 29121998 | Blood | 50  | 50 | DC    | miRNA classifier        | 82.0  | 80.0 |
| Li 2018         | 30210445 | CSF   | 53  | 32 | DC    | pNFH > 1104 pg/mL       | 100.0 | 68.8 |
| Li 2018         | 30210445 | CSF   | 53  | 32 | DC    | NFL > 1139 pg/mL        | 96.2  | 56.3 |
| Salter 2018     | 29941342 | Blood | 40  | 34 | HC    | EpiSwitch Signature     | 83.3  | 76.9 |
| Salter 2018     | 29941342 | Blood | 8   | 8  | HC    | EpiSwitch Signature     | 87.5  | 75.0 |
