# Supplementary material for: ALS blood expression profiling identifies new biomarkers, patient subgroups, and evidence for neutrophilia and hypoxia
Source: Springer Nature journal article supplement (doi:10.1186/s12967-019-1909-0), 2019-05-22
Supplement: MOESM23 [file 16742172]

**Additional File 23. 61 gene signature for prediction of ALS patient survival.** The table lists the 61 genes incorporated into the final Cox PH regression model developed to predict ALS patient survival. Columns 2 and 3 provide hazard ratio (HR) estimates from unigenic Cox PH models, which were fit with five predictor variables, including expression of the gene listed in column 1 with four covariates (age, sex, site of onset, cohort). The second column gives the HR estimate with 95% confidence limits (HR > 1: increased expression = worse survival; HR < 1: increased expression = improved survival). Columns 4 and 5 provide results from likelihood ratio tests (LRT) comparing goodness of fit between full models (61 predictor genes + 4 covariates) and reduced models (60 predictor genes + 4 covariates, with removal of the gene listed in column 1). The  $\chi^2$  statistic obtained from each LRT is given (column 4) with p-value obtained from the  $\chi^2$  null distribution with 1 degree of freedom (column 5). Genes for which expression contributes most to goodness of fit have larger  $\chi^2$  statistics (and lower p-values).

| Symbol           | Unigenic Cox PH Model |          | Multigenic Cox PH Model |         |
|------------------|-----------------------|----------|-------------------------|---------|
|                  | HR                    | P-Value  | $\chi^2$ Statistic      | P-value |
| <i>SLC39A14</i>  | 1.25 (1.11, 1.4)      | 0.000269 | 13.72                   | 0.00021 |
| <i>CDC14B</i>    | 1.24 (1.1, 1.39)      | 0.000255 | 8.96                    | 0.0028  |
| <i>OSBPL9</i>    | 1.24 (1.09, 1.4)      | 0.000972 | 10.35                   | 0.0013  |
| <i>IFNGR2</i>    | 1.23 (1.09, 1.39)     | 0.000898 | 7.5                     | 0.0062  |
| <i>ATXNIL</i>    | 1.21 (1.08, 1.36)     | 0.00124  | 2.24                    | 0.13    |
| <i>UBR5</i>      | 1.21 (1.07, 1.36)     | 0.00166  | 11.81                   | 0.00059 |
| <i>USP3</i>      | 1.2 (1.07, 1.34)      | 0.00122  | 4.4                     | 0.036   |
| <i>RAB1A</i>     | 1.2 (1.06, 1.36)      | 0.00396  | 6.9                     | 0.0086  |
| <i>RNF38</i>     | 1.19 (1.06, 1.34)     | 0.0045   | 10.98                   | 0.00092 |
| <i>ELAC1</i>     | 1.19 (1.06, 1.34)     | 0.00334  | 26.6                    | 2.5E-07 |
| <i>RNFT1</i>     | 1.18 (1.07, 1.32)     | 0.00159  | 9.53                    | 0.002   |
| <i>JPH3</i>      | 1.18 (1.04, 1.33)     | 0.00825  | 10.06                   | 0.0015  |
| <i>TM6SF1</i>    | 1.18 (1.05, 1.32)     | 0.00464  | 7.77                    | 0.0053  |
| <i>ITPR2</i>     | 1.18 (1.05, 1.32)     | 0.00552  | 5.75                    | 0.016   |
| <i>ME2</i>       | 1.18 (1.04, 1.33)     | 0.00959  | 5.7                     | 0.017   |
| <i>SLC40A1</i>   | 1.17 (1.03, 1.32)     | 0.0124   | 9.75                    | 0.0018  |
| <i>YWHAH</i>     | 1.17 (1.05, 1.3)      | 0.00505  | 8.46                    | 0.0036  |
| <i>C16orf86</i>  | 1.16 (1.04, 1.3)      | 0.00824  | 8.72                    | 0.0031  |
| <i>KIDINS220</i> | 1.16 (1.04, 1.29)     | 0.00777  | 10.68                   | 0.0011  |

|                 |                    |         |       |          |
|-----------------|--------------------|---------|-------|----------|
| <i>CLEC7A</i>   | 1.15 (1.04, 1.27)  | 0.00498 | 3.54  | 0.06     |
| <i>MTFMT</i>    | 1.15 (1.02, 1.3)   | 0.0277  | 3.78  | 0.052    |
| <i>RAB21</i>    | 1.15 (1.03, 1.28)  | 0.0121  | 20.42 | 6.2E-06  |
| <i>FZD3</i>     | 1.14 (1.02, 1.29)  | 0.0237  | 7.19  | 0.0074   |
| <i>MAN2A2</i>   | 1.14 (1.03, 1.27)  | 0.0158  | 3.41  | 0.065    |
| <i>CLEC4D</i>   | 1.14 (1.02, 1.26)  | 0.0172  | 5.95  | 0.015    |
| <i>PRKCB</i>    | 1.13 (1.02, 1.26)  | 0.0168  | 8.05  | 0.0046   |
| <i>NUP58</i>    | 1.13 (1.01, 1.26)  | 0.0349  | 18.85 | 0.000014 |
| <i>FBXO4</i>    | 1.13 (1.01, 1.25)  | 0.0259  | 14.32 | 0.00015  |
| <i>SEC62</i>    | 1.13 (1.01, 1.25)  | 0.0293  | 5.84  | 0.016    |
| <i>TRIM22</i>   | 1.11 (1.003, 1.24) | 0.043   | 6.51  | 0.011    |
| <i>IGSF11</i>   | 0.9 (0.8, 0.997)   | 0.043   | 22.94 | 1.7E-06  |
| <i>RGS17</i>    | 0.89 (0.8, 0.996)  | 0.0423  | 2.15  | 0.14     |
| <i>SERPINH1</i> | 0.89 (0.8, 0.99)   | 0.0269  | 7.29  | 0.0069   |
| <i>C9orf78</i>  | 0.89 (0.8, 0.99)   | 0.027   | 6.16  | 0.013    |
| <i>TRPM7</i>    | 0.88 (0.8, 0.98)   | 0.0156  | 15.75 | 0.000072 |
| <i>SLC38A10</i> | 0.88 (0.79, 0.98)  | 0.0216  | 14.82 | 0.00012  |
| <i>ZNF598</i>   | 0.88 (0.79, 0.98)  | 0.0202  | 4.91  | 0.027    |
| <i>DCAF4L1</i>  | 0.88 (0.78, 0.99)  | 0.0303  | 12.6  | 0.00039  |
| <i>ZNF429</i>   | 0.88 (0.78, 0.98)  | 0.0265  | 35.59 | 2.4E-09  |
| <i>PHLDA2</i>   | 0.88 (0.79, 0.97)  | 0.0135  | 9.29  | 0.0023   |
| <i>C12orf10</i> | 0.87 (0.79, 0.96)  | 0.00583 | 24.89 | 6.1E-07  |
| <i>MIS18A</i>   | 0.87 (0.78, 0.97)  | 0.0124  | 25.47 | 4.5E-07  |
| <i>TASP1</i>    | 0.87 (0.78, 0.98)  | 0.0198  | 14.11 | 0.00017  |
| <i>CCDC51</i>   | 0.87 (0.77, 0.97)  | 0.0123  | 4.44  | 0.035    |
| <i>LMNA</i>     | 0.86 (0.78, 0.95)  | 0.00336 | 21.68 | 3.2E-06  |
| <i>MTMR11</i>   | 0.86 (0.78, 0.96)  | 0.00543 | 7.3   | 0.0069   |
| <i>NME4</i>     | 0.86 (0.77, 0.95)  | 0.00374 | 3.46  | 0.063    |
| <i>RNASE2</i>   | 0.86 (0.77, 0.95)  | 0.00307 | 7.44  | 0.0064   |

|                 |                   |          |       |          |
|-----------------|-------------------|----------|-------|----------|
| <i>VRK3</i>     | 0.85 (0.76, 0.96) | 0.00691  | 5.11  | 0.024    |
| <i>CDIP1</i>    | 0.85 (0.76, 0.96) | 0.00674  | 4.46  | 0.035    |
| <i>PCDHB14</i>  | 0.85 (0.77, 0.94) | 0.00229  | 13.15 | 0.00029  |
| <i>APCDD1</i>   | 0.85 (0.77, 0.94) | 0.00127  | 13.04 | 0.0003   |
| <i>WDR6</i>     | 0.85 (0.76, 0.95) | 0.00466  | 14.8  | 0.00012  |
| <i>ACADS</i>    | 0.85 (0.76, 0.94) | 0.00234  | 15.72 | 0.000073 |
| <i>ITLN1</i>    | 0.85 (0.76, 0.94) | 0.00165  | 12.72 | 0.00036  |
| <i>LAMTOR2</i>  | 0.84 (0.76, 0.94) | 0.00176  | 4.77  | 0.029    |
| <i>TMEM147</i>  | 0.84 (0.76, 0.94) | 0.00152  | 4.47  | 0.034    |
| <i>C19orf44</i> | 0.84 (0.76, 0.93) | 0.00126  | 5.96  | 0.015    |
| <i>GGT7</i>     | 0.84 (0.75, 0.93) | 0.000788 | 7.28  | 0.007    |
| <i>CEBPE</i>    | 0.79 (0.71, 0.89) | 6.14E-05 | 6.7   | 0.0096   |
| <i>CCS</i>      | 0.77 (0.68, 0.87) | 1.84E-05 | 12.85 | 0.00034  |
